# Supplementary material
Source: Elsevier journal article supplement (https://www.sciencedirect.com/science/article/pii/S1885585717301184)
Supplement: mmc1 [file mmc1.pdf]

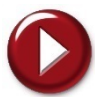

## Material suplementario

# Tendencia y características de la hospitalización por insuficiencia cardiaca en un marco poblacional durante el periodo 2003-2013

**Tabla 1 del material suplementario.** Variables incluidas en el índice de comorbilidad de Elixhauser

| Variables                             |                                                        |
|---------------------------------------|--------------------------------------------------------|
| Insuficiencia cardiaca congestiva     | Enfermedad por VIH                                     |
| Arritmia cardiaca                     | Linfoma                                                |
| Enfermedad valvular cardiaca          | Cáncer metastásico                                     |
| Enfermedad de la circulación pulmonar | Tumor sólido sin metástasis                            |
| Enfermedad vascular periférica        | Artritis reumatoide o enfermedad del colágeno vascular |
| Hipertensión                          | Coagulopatía                                           |
| Parálisis                             | Obesidad                                               |
| Otras enfermedades neurológicas       | Pérdida de peso                                        |
| Enfermedad pulmonar crónica           | Alteración de fluidos y electrolitos corporales        |
| Diabetes no complicada                | Anemia por pérdida de sangre                           |
| Diabetes complicada                   | Anemia por otras deficiencias                          |
| Hipotiroidismo                        | Alcoholismo                                            |
| Fallo renal                           | Abuso de drogas                                        |
| Enfermedad hepática                   | Psicosis                                               |
| Úlcera péptica sin hemorragia         | Depresión                                              |

VIH: virus de la inmunodeficiencia humana.

**Tabla 2 del material suplementario.** Porcentaje de episodios con 2 o más factores de riesgo según el grupo de edad (2003-2013)

|          | 2003 | 2004 | 2005 | 2006 | 2007 | 2008 | 2009 | 2010 | 2011 | 2012 | 2013 | Total |
|----------|------|------|------|------|------|------|------|------|------|------|------|-------|
| 0-44     | 0,0  | 0,0  | 7,4  | 18,8 | 27,8 | 12,1 | 12,0 | 6,3  | 2,7  | 5,1  | 21,4 | 10,0  |
| 45-64    | 17,5 | 37,7 | 28,0 | 33,9 | 28,3 | 29,0 | 39,6 | 30,6 | 36,8 | 34,7 | 39,4 | 32,8  |
| 65-74    | 25,5 | 29,5 | 34,4 | 34,8 | 29,0 | 31,5 | 34,4 | 32,3 | 33,0 | 35,0 | 34,2 | 32,2  |
| 75-84    | 13,7 | 19,4 | 21,2 | 22,0 | 20,2 | 21,2 | 22,6 | 23,2 | 24,1 | 28,6 | 26,0 | 22,7  |
| 85 o más | 10,9 | 11,0 | 9,6  | 12,6 | 16,9 | 19,9 | 15,4 | 16,2 | 15,2 | 17,4 | 16,0 | 15,2  |
| Total    | 17,1 | 22,7 | 23,4 | 25,0 | 22,6 | 23,1 | 25,0 | 23,6 | 24,1 | 26,8 | 25,9 | 23,9  |

**Tabla 3 del material suplementario.** Frecuencia (porcentaje) de diferentes cardiopatías en los episodios por insuficiencia cardiaca durante el periodo 2003-2013

|                            | 2003 | 2004 | 2005 | 2006 | 2007 | 2008 | 2009 | 2010 | 2011 | 2012 | 2013 | Total |
|----------------------------|------|------|------|------|------|------|------|------|------|------|------|-------|
| <i>Arritmias</i>           | 62,1 | 65,8 | 66,0 | 64,9 | 60,0 | 61,3 | 62,5 | 64,1 | 66,2 | 64,5 | 64,1 | 63,7  |
| <i>Isquémica</i>           | 29,7 | 32,5 | 34,4 | 32,5 | 30,7 | 29,9 | 29,7 | 29,1 | 30,3 | 29,6 | 29,9 | 30,6  |
| <i>Valvular</i>            | 31,6 | 30,2 | 29,1 | 27,5 | 25,2 | 28,2 | 29,9 | 29,6 | 30,4 | 27,6 | 31,3 | 29,1  |
| <i>Hipertensiva</i>        | 25,9 | 23,4 | 26,7 | 22,0 | 25,3 | 27,4 | 25,7 | 25,1 | 25,5 | 23,7 | 23,5 | 24,9  |
| <i>Otras*</i>              | 30,0 | 27,9 | 25,5 | 20,8 | 19,5 | 19,9 | 18,9 | 16,8 | 17,8 | 18,1 | 15,8 | 20,1  |
| <i>N.º de cardiopatías</i> |      |      |      |      |      |      |      |      |      |      |      |       |
| Ninguna                    | 8,8  | 9,6  | 8,3  | 9,5  | 11,4 | 10,8 | 10,4 | 10,1 | 9,4  | 10,1 | 10,8 | 10,0  |
| 1                          | 30,7 | 28,5 | 30,6 | 33,9 | 36,2 | 32,7 | 33,5 | 36,5 | 32,8 | 34,6 | 34,8 | 33,5  |
| 2                          | 38,0 | 38,5 | 37,5 | 38,9 | 36,1 | 38,3 | 37,8 | 34,9 | 39,4 | 39,3 | 36,3 | 37,7  |
| 3 o más                    | 22,5 | 23,4 | 23,6 | 17,7 | 16,4 | 18,2 | 18,2 | 18,4 | 18,4 | 16,0 | 18,0 | 18,8  |

\*Miocardiopatías, enfermedades del pericardio, cardiopatías congénitas.
